# Supplementary material for: Trajectories of Preschool Disorders to Full DSM Depression at School Age and Early Adolescence: Continuity of Preschool Depression
Source: Atypon-hosted journal article supplement (doi:10.1176/appi.ajp.2014.13091198), 2014-04-04
Supplement: 768_ds001.pdf [file 768_ds001.pdf]

**TABLE S1. Studies Validating Preschool-Onset Depression**

| <b>Study</b>                                  | <b>Sample Size</b> | <b>Age Range (in years)</b> | <b>Sample</b>                              | <b>Diagnostic Measures</b>                                                | <b>Validation</b>                             |
|-----------------------------------------------|--------------------|-----------------------------|--------------------------------------------|---------------------------------------------------------------------------|-----------------------------------------------|
| Kashani et al., 1984 (1)                      | N= 100             | 1-6                         | Sample drawn from a child development unit | Clinical interview by a child psychiatrist; parent-child interaction task | Construct                                     |
| Kashani et al., 1986 (2)                      | N= 109             | 2.5-7                       | General population sample                  | The Behavior Checklist; GRASP; the Coddington Life Events Scale           | Construct                                     |
| Kashani et al., 1987 (3)                      | N= 1,000           | 1-9                         | Sample drawn from a child development unit | Clinical interviews by child psychiatrist; parent-child interaction task  | Construct                                     |
| Kashani et al., 1997 (4)                      | N= 300             | 2-6                         | Clinically referred preschoolers           | Parent and Teacher CBCL; clinical interview by a child psychiatrist       | Construct                                     |
| Luby et al., 2002 (5)<br>Luby et al. 2003 (6) | N= 136<br>N= 174   |                             |                                            | DISC-YC; FIGS; BPI salivary cortisol samples; DISC-YC; BPI                | Construct/Discriminant<br>External Biological |
| Luby et al., 2004 (7)                         | N= 156             | 3-5.6                       | Longitudinal                               | DISC-YC; FIGS ;Lab-TAB; salivary Cortisol samples                         | Discriminant                                  |
| Luby et al., 2006 (8)                         | N= 152             |                             |                                            | DISC-YC; parent-child interaction ("The Teaching Task")                   | External observational                        |

**TABLE S1. Studies Validating Preschool-Onset Depression (Continued)**

| <b>Study</b>                        | <b>Sample Size</b>                                             | <b>Age Range (in years)</b>                | <b>Sample</b>                                   | <b>Diagnostic Measures</b>       | <b>Validation</b>      |
|-------------------------------------|----------------------------------------------------------------|--------------------------------------------|-------------------------------------------------|----------------------------------|------------------------|
| Sterba et al., 2007 (9)             | N= 317                                                         | 2-5                                        | Sample drawn from a pediatric clinic            | PAPA; CBCL                       | Construct/Discriminant |
| Lavigne et al., 2009 (10)           | N= 796                                                         | 4                                          | Community sample                                | DISC–YC; CSI                     | Construct/Discriminant |
| Domènech-Llaberia et al., 2009 (11) | N=1,267                                                        | 3-6                                        | Community sample                                | ESDM 3-6; ECI-4                  | Construct              |
| Luby et al. 2009 (12)               | N= 306                                                         | 3-5.11                                     |                                                 | PAPA                             | Predictive             |
| Luby et al. 2009 (13)               | N= 305                                                         | 3-6                                        |                                                 | PAPA                             | Construct              |
| Luby et al. 2009 (14)               | N= 305                                                         | 3-5.11                                     |                                                 | PAPA                             | Construct              |
| Gaffrey et al., 2010 (15)           | N= 36                                                          | 3-5.11 <sup>a</sup> ;8.7-10.5 <sup>b</sup> |                                                 | PAPA, Parent and Child CDI, CSMS | External Biological    |
| Gaffrey et al., 2011 (16)           | N=151                                                          | 3-5.11                                     | Longitudinal                                    | PAPA; HBQ                        | Construct/Predictive   |
| Gaffrey et al., 2012 (17)           | N=39                                                           | 3-5.11 <sup>a</sup> ;7.9-10.6 <sup>b</sup> |                                                 | PAPA; WASI; Child CDI; CEMS      | External Biological    |
| Barch et al., 2012 (18)             | N=38                                                           | 3-5.11 <sup>a</sup> ;7-11 <sup>b</sup>     |                                                 | PAPA; Parent and Child CDI       | External Biological    |
| Gleason et al., 2011 (19)           | N=1,003 (completed CBCL)<br><br>N= 350 (completed CBCL & PAPA) | 18-60 months                               | Sample drawn from a Romanian pediatric hospital | CBCL; PAPA                       | Construct              |

**TABLE S1. Studies Validating Preschool-Onset Depression (Continued)**

| Study                       | Sample Size                                | Age Range (in years)            | Sample           | Diagnostic Measures                             | Validation              |
|-----------------------------|--------------------------------------------|---------------------------------|------------------|-------------------------------------------------|-------------------------|
| Dougherty et al., 2011 (20) | N= 541                                     | 3                               | Community sample | Lab-TAB; PAPA; ECI-4                            | Construct               |
| Bufferd et al., 2012 (21)   | N= 541 <sup>a</sup><br>N= 462 <sup>b</sup> | 3 <sup>a</sup> ; 6 <sup>b</sup> |                  | PAPA; ECI-4                                     | Predictive/Discriminant |
| Gaffrey et al., 2013 (22)   | N= 54                                      | 4-6                             | Criterion        | PAPA; ERC; FACE-EL; Facial Emotion Viewing Task | External Biological     |

NOTE: GRASP= General Rating of Affective Symptoms for Preschoolers; CBCL= Child Behavior Checklist; PDS= Preschool Depression Scale; RABI= Rochester Adaptive Behavior Inventory; DICA= Diagnostic Interview for Children and Adolescents; CGAS= Children’s Global Assessment Scale; FES= Family Environment Scale; DISC-YC= Diagnostic Interview Schedule for Children–Parent Scale–Young Child Version; CSI= Child Symptom Inventory; ECI-4= Early Childhood Inventory-4; VABS= Vineland Adaptive Behavior Screener Socialization subscale; Lab-TAB= Laboratory Temperament Assessment Battery; FIGS= Family Interview for Genetic Studies; BPI= Berkeley Puppet Interview; CDI= Child Depression Inventory; CSMS= Children’s Sadness Management Scale; HBQ= MacArthur Health and Behavior Questionnaire; WASI= Wechsler Abbreviated Scale of Intelligence; CEMS= Children’s Emotion Management Scale; ERC= Emotion Regulation Checklist; FACE-EL= Facial Affect Comprehensive Evaluation Emotion Labeling subtest; ESDM 3-6= Escala de depresión preescolar para maestros; SDQ= Strengths and Difficulties Questionnaire

<sup>a</sup> At initial assessment

<sup>b</sup> At follow-up

**TABLE S2. Assessments Table (N=246)**

|                           | Mean | SD   | Min | Max |
|---------------------------|------|------|-----|-----|
| Preschool age assessments | 2.50 | 1.16 | 1   | 5   |
| School age assessments    | 5.20 | 1.80 | 1   | 9   |
| Total assessments         | 7.70 | 1.74 | 2   | 10  |

**FIGURE S1. Study Recruitment and Retention**

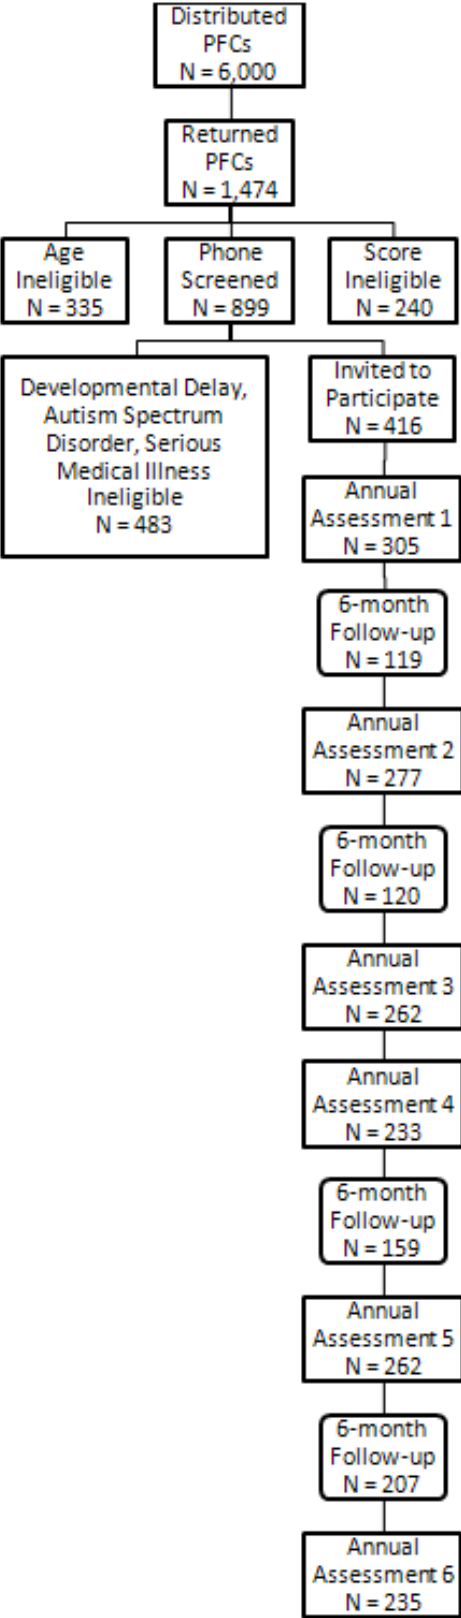

## REFERENCES

1. Kashani JH, Ray JS, Carlson GA. Depression and depressive-like states in preschool-age children in a child development unit. *Am J Psychiatry* 1984; 141:1397-402.
2. Kashani JH, Holcomb WR, Orvaschel H. Depression and depressive symptoms in preschool children from the general population. *Am J Psychiatry* 1986; 143:1138-43.
3. Kashani JH, Carlson GA. Seriously depressed preschoolers. *Am J Psychiatry* 1987; 144:348-50.
4. Kashani JH, Allan WD, Beck NC, Jr., Bledsoe Y, Reid JC. Dysthymic disorder in clinically referred preschool children. *J Am Acad Child Adolesc Psychiatry* 1997; 36:1426-33.
5. Luby JL, Heffelfinger AK, Mrakotsky C, Hessler MJ, Brown KM, Hildebrand T. Preschool major depressive disorder: Preliminary validation for developmentally modified DSM-IV criteria. *J Am Acad Child Adolesc Psychiatry* 2002; 41:928-37.
6. Luby JL, Heffelfinger A, Mrakotsky C, Brown K, Hessler M, Spitznagel E. Alterations in stress cortisol reactivity in depressed preschoolers relative to psychiatric and no-disorder comparison groups. *Arch Gen Psychiatry* 2003; 60:1248-55.
7. Luby JL, Mrakotsky C, Heffelfinger A, Brown K, Spitznagel E. Characteristics of depressed preschoolers with and without anhedonia: Evidence for a melancholic depressive subtype in young children. *Am J Psychiatry* 2004; 161:1998-2004.
8. Luby JL, Sullivan J, Belden AC, Stalets M, Blankenship S, Spitznagel E. An observational analysis of behavior in depressed preschoolers: further validation of early-onset depression. *J Am Acad Child Adolesc Psychiatry* 2006; 45:203-12.
9. Sterba S, Egger HL, Angold A. Diagnostic specificity and nonspecificity in the dimensions of preschool psychopathology. *J Child Psychol Psychiatry* 2007; 48:1005-13.
10. Lavigne JV, LeBailly SA, Hopkins J, Gouze KR, Binns HJ. The prevalence of ADHD, ODD, depression, and anxiety in a community sample of 4-year-olds. *J Clin Child Adolesc Psychol* 2009; 38:315-28.
11. Domènech-Llaberia E, Viñas F, Pla E, Jané MC, Mitjavila M, Corbella T, Canals J. Prevalence of major depression in preschool children. *Eur Child Adolesc Psychiatry* 2009; 18:597-604.
12. Luby JL, Si X, Belden AC, Tandon M, Spitznagel E. Preschool depression: Homotypic continuity and course over 24 months. *Arch Gen Psychiatry* 2009; 66:897-905.
13. Luby JL, Belden AC, Pautsch J, Si X, Spitznagel E. The clinical significance of preschool depression: Impairment in functioning and clinical markers of the disorder. *J Affect Disord* 2009; 112:111-9.
14. Luby J, Belden AC, Sullivan J, Hayen R, McCadney A, Spitznagel E. Shame and guilt in preschool depression: evidence for elevations in self-conscious emotions in depression as early as age 3. *J Child Psychol Psychiatry* 2009; 50:1156-66.
15. Gaffrey MS, Luby JL, Repovs G, Belden AC, Botteron KN, Luking KR, Barch DM. Subgenual cingulate connectivity in children with a history of preschool-depression. *Neuroreport* 2010; 21:1182-8.
16. Gaffrey MS, Belden AC, Luby JL. The 2-week duration criterion and severity and course of early childhood depression: implications for nosology. *J Affect Disord* 2011; 133:537-45.
17. Gaffrey MS, Luby JL, Botteron K, Repovs G, Barch DM. Default mode network connectivity in children with a history of preschool onset depression. *J Child Psychol Psychiatry* 2012; 53:964-72.

18. Barch DM, Gaffrey MS, Botteron KN, Belden AC, Luby JL. Functional brain activation to emotionally valenced faces in school-aged children with a history of preschool-onset major depression. *Biol Psychiatry* 2012; 72:1035-42.
19. Gleason MM, Zamfirescu A, Egger HL, Nelson 3rd CA, Fox NA, Zeanah CH. Epidemiology of psychiatric disorders in very young children in a Romanian pediatric setting. *Eur Child Adolesc Psychiatry* 2011; 20:527-35.
20. Dougherty LR, Bufferd SJ, Carlson GA, Dyson M, Olini TM, Durbin CE, Klein DN. Preschoolers' observed temperament and psychiatric disorders assessed with a parent diagnostic interview. *J Clin Child Adolesc Psychol* 2011; 40:295-306.
21. Bufferd SJ, Dougherty LR, Carlson GA, Rose S, Klein DN. Psychiatric disorders in preschoolers: Continuity from ages 3 to 6. *Am J Psychiatry* 2012; 169:1157-64.
22. Gaffrey MS, Barch DM, Singer J, Shenoy R, Luby JL. Disrupted amygdala reactivity in depressed 4- to 6-year-old children. *J Am Acad Child Adolesc Psychiatry* 2013; 52:737-46.
